# Supplementary material for: Enhanced catalytic reduction of oxygen at tantalum deposited platinum electrode
Source: Royal Society of Chemistry journal article supplement (doi:10.1039/b916826e), 2010-01-01
Supplement: b916826e.pdf [file b916826e.pdf]

## Supporting Information

# Enhanced Catalytic Reduction of Oxygen at Tantalum Deposited Platinum Electrode

Begum Nadira Ferdousi<sup>a</sup>, Md. Mominul Islam<sup>a</sup>, Takeyoshi Okajima<sup>a</sup>, Lanqun Mao<sup>b</sup>, and Takeo Ohsaka<sup>a\*</sup>

<sup>a</sup>Department of Electronic Chemistry, Interdisciplinary Graduate School of Science and Engineering, Tokyo Institute of Technology, 4259-G1-5 Nagatsuta, Midori-ku, Yokohama 226-8502, Japan. Fax: + 81-45-924-5489; Tel: +81-45-924-5404; E-mail: [ohsaka@echem.titech.ac.jp](mailto:ohsaka@echem.titech.ac.jp)

<sup>b</sup>Beijing National Laboratory for Molecular Sciences, Institute of Chemistry, Chinese Academy of Science, Beijing 100080, China

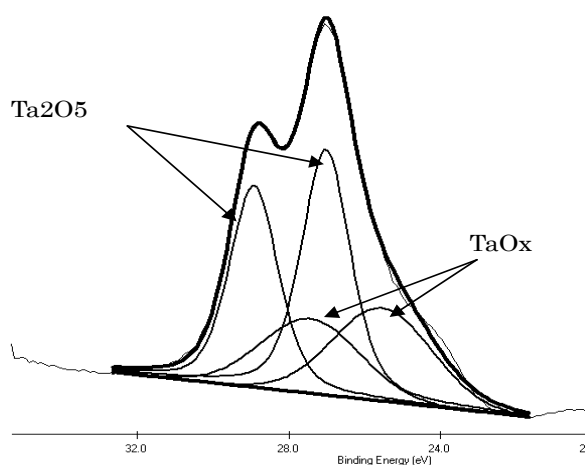

|       |        |        |
|-------|--------|--------|
| TaOx  | 4f 7/2 | 4f 5/2 |
|       | 25.53  | 27.43  |
| Ta2O5 | 27.02  | 28.92  |

**Fig. SI-1.** Deconvoluted XPS profile of Ta 4f energy level of the Ta/Pt surface. The data was taken from Fig. 3.

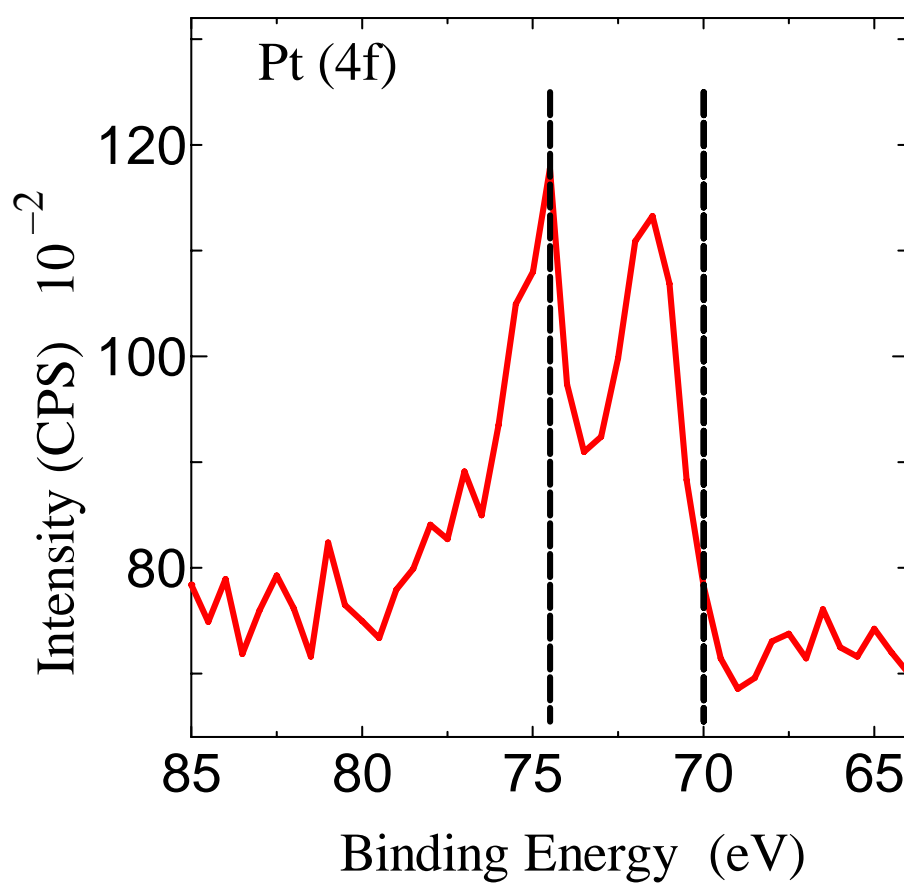

**Fig. SI-2.** XPS profile of Pt 4f energy level of the underlying Pt surface of the Ta/Pt electrode.

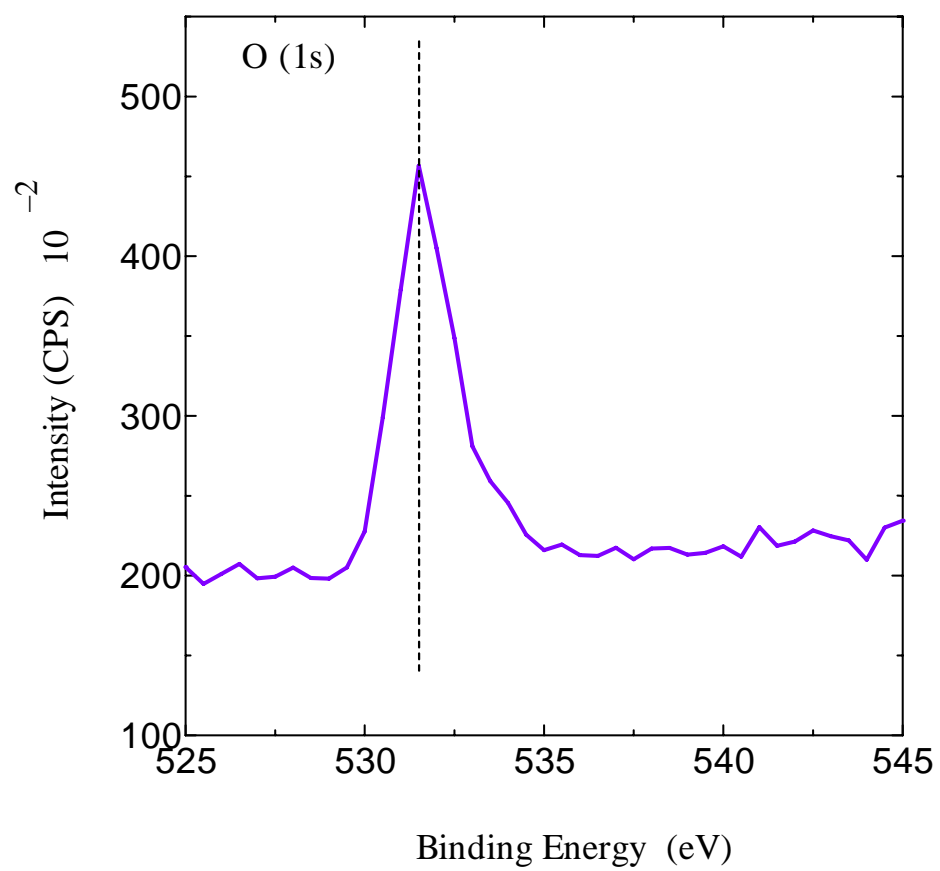

Fig. SI-3. XPS profile of O 1s energy level on the Ta/Pt electrode surface.
